# Supplementary material for: Taurine: an essential amino sulfonic acid for retinal health
Source: PubMed Central journal article supplement — Neural Regen Res. 2022 Sep 16;18(4):807–8. doi: 10.4103/1673-5374.353491 (PMC9700098; doi:10.4103/1673-5374.353491), 2022-09-16
Supplement: NRR-18-807_Suppl1.pdf [file NRR-18-807_Suppl1.pdf]

## OPEN PEER REVIEW REPORT 1

**Name of journal:** Neural Regeneration Research

**Manuscript NO:** NRR-D-22-00198

**Title:** Taurine: an essential amino sulfonic acid for retinal health

**Reviewer's Name:** Yong Liu

**Reviewer's country:** China

### COMMENTS TO AUTHORS

Taurine to retinal health is an important and interesting topic to neural development. This review mainly summarizes author's main achievements and possible future applications on taurine. However, some contents should be added.

- 1, the author did some explorative work on the role of taurine to retinal development, please add some new findings from other lab.
- 2, detailed analysis should be necessary, such as that how taurine acts cellular message transmission pathway, which target organelle is involved in taurine physiological function, mitochondria or ribosome?
- 3, the author said taurine might decrease the sensitivity threshold of retinal cells to light damage. Please further discuss the possible relationship between retinal phototransduction and taurine function.
